# Supplementary material for: An Immunosensor Based on Au-Ag Bimetallic NPs Patterned on a Thermal Resistant Flexible Polymer Substrate for In-Vitro Protein Detection
Source: MDPI journal article supplement (doi:10.3390/polym11081257), 2019-07-29
Supplement: s1 [file s1]

# An Immunosensor Based on Au-Ag Bimetallic NPs Patterned on a Thermal Resistant Flexible Polymer Substrate for In-vitro Protein Detection

Pan Wang, Shiliang Wei, Lifeng Tong, Xiaohong He, Yun Bai, Kun Jia \*, Xiaobo Liu \*

Research Branch of Advanced Functional Materials, School of Materials and Energy, University of Electronic Science and Technology of China, Chengdu 610054, P. R. China

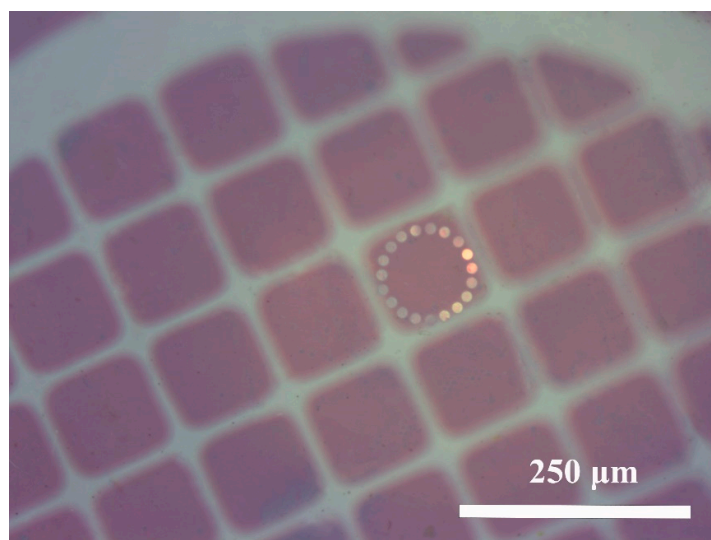

**Figure S1.** The microscope image of PEN/Au-Ag NPs sample. Aureole circled area was the test region.

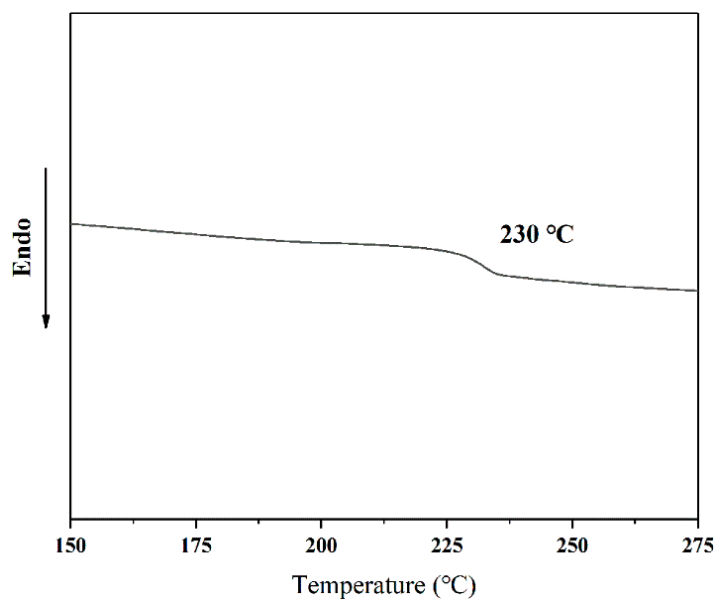

**Figure S2.** DSC spectrum of employed PEN.

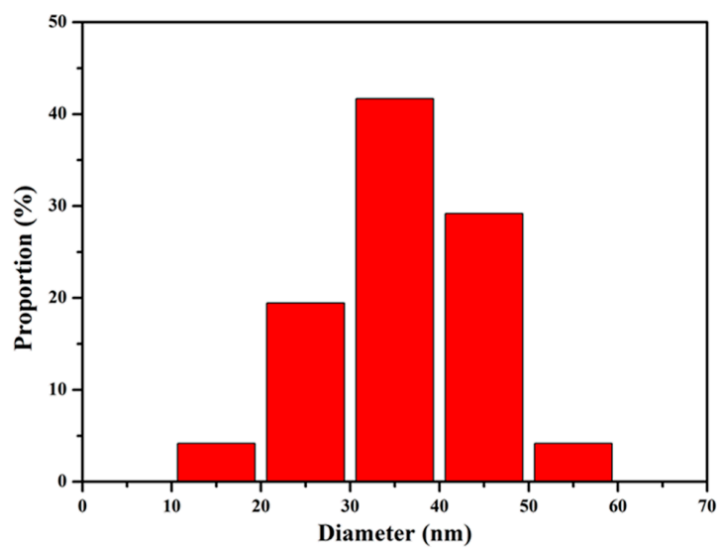

**Figure S3.** The histograms of the particle size distribution according to the SEM result of PEN/Au-Ag NPs annealing at 290 °C.

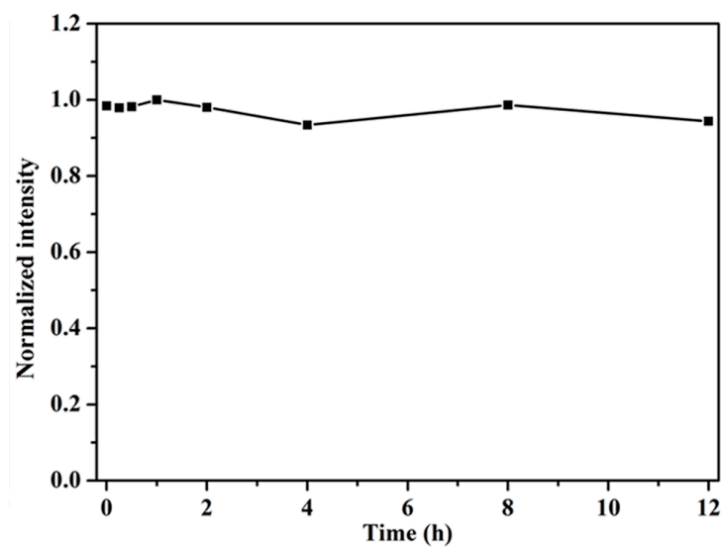

**Figure S4.** The normalized intensity of PEN/Au-Ag NPs (annealing at 290 °C) suffered from absolute ethanol for different times.

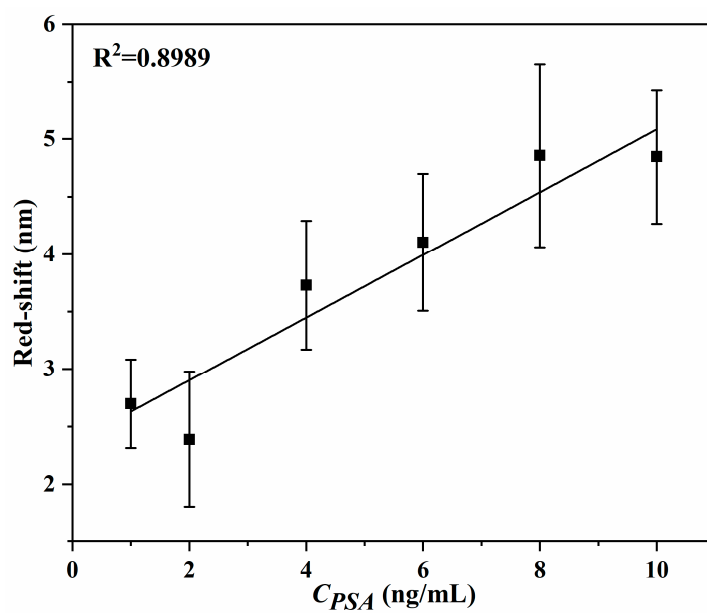

**Figure S5.** The dose dependent responses to PSA antigen of different concentrations (1 to 10 ng/mL) and the corresponding linear fitting curve.
